# Supplementary material
Source: MDPI journal article supplement (https://www.mdpi.com/1999-4907/13/7/1102)

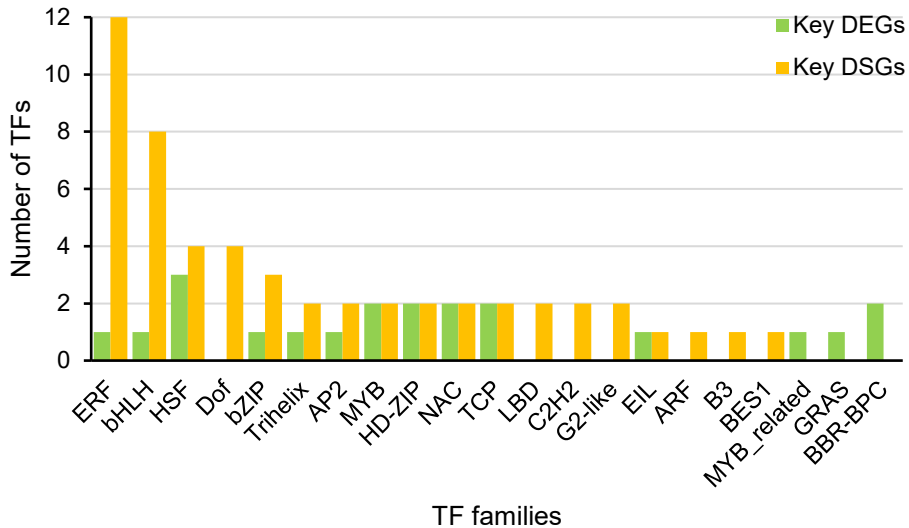

Supplement: s1 [file s1]

(a)

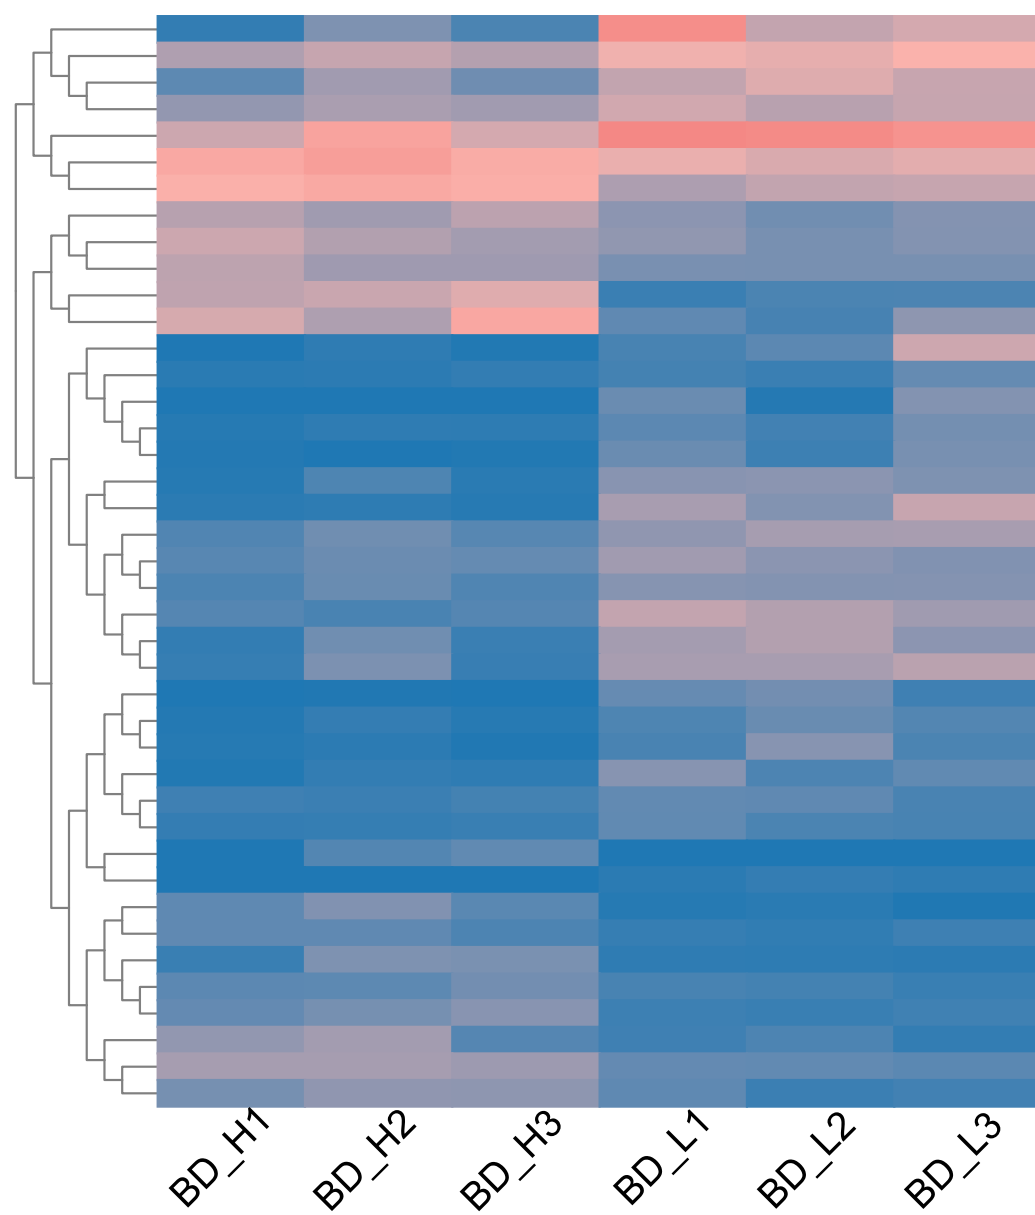

(b)

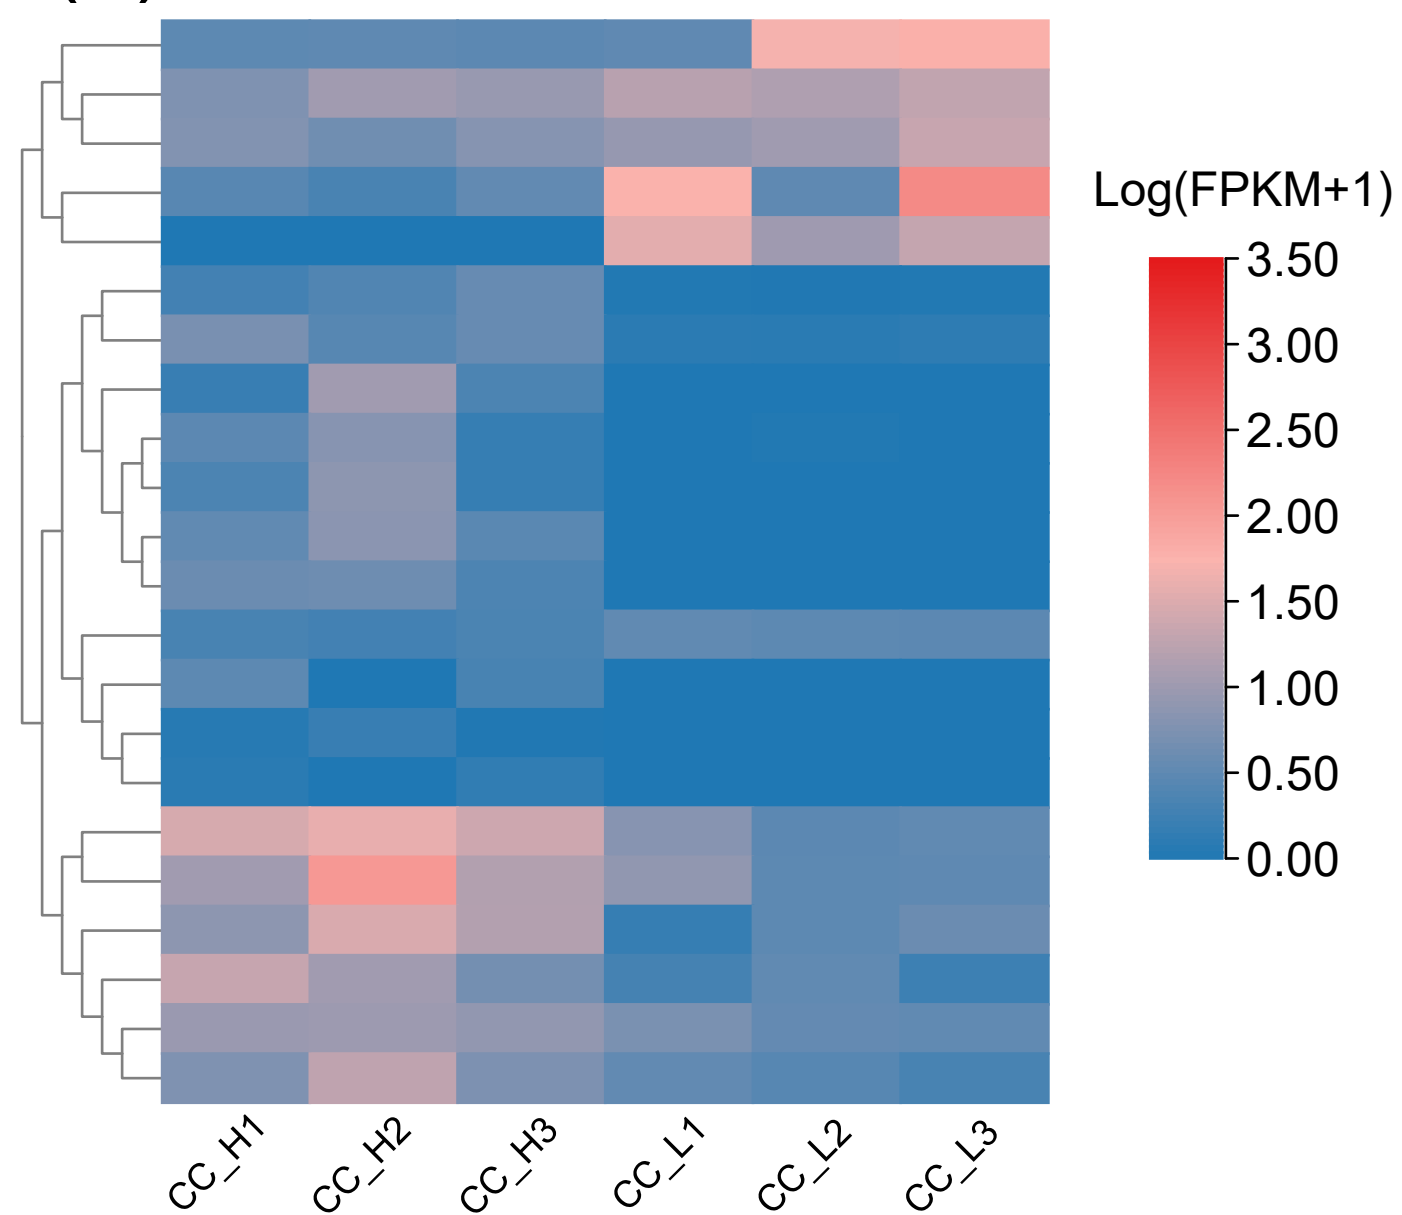

(c)

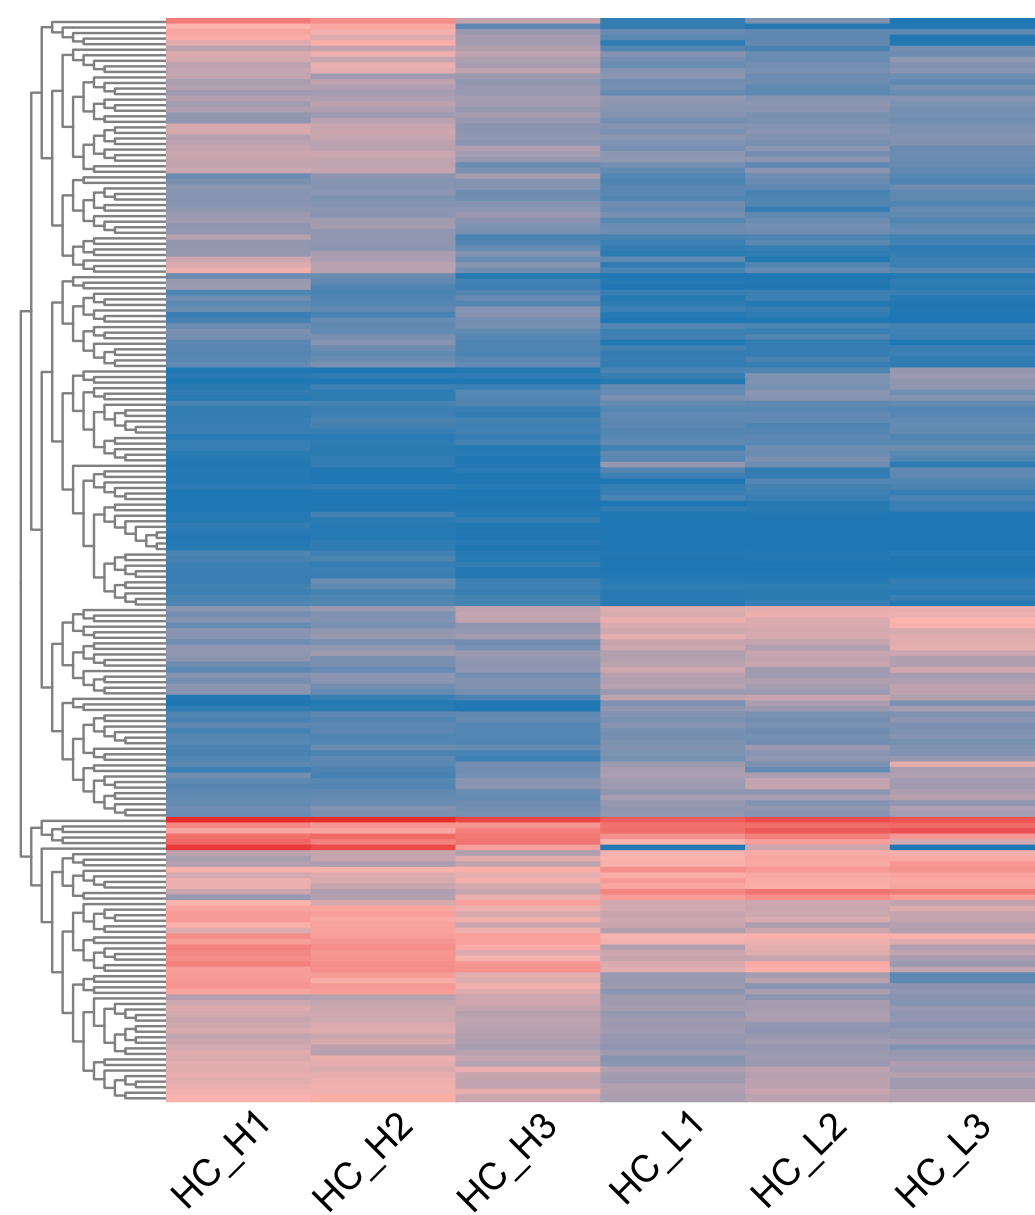

(d)

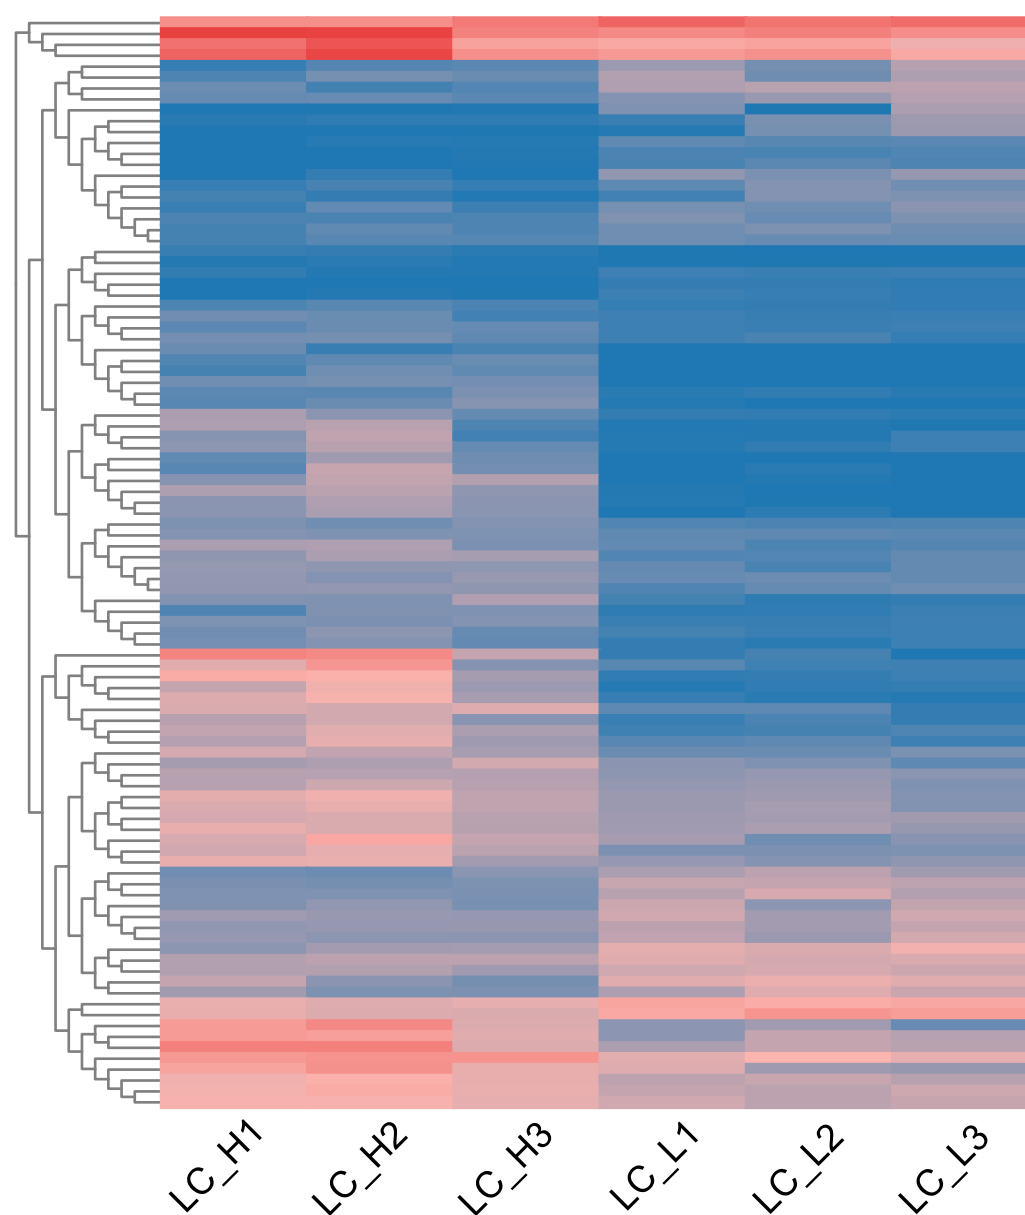

Supplement: s1 [file s1]
